# Supplementary material
Source: publisher figshare collection journal article supplement (https://sage.figshare.com/ndownloader/files/13175150)
Supplement: Supplementary file 1 [file 13175150]

## ONLINE SUPPL TABLES

**Table1. Statistics**

|                      | Mean  | Std.<br>deviation | Minimum | Maximum | N     | Variable operationalization                                                                                                                              |
|----------------------|-------|-------------------|---------|---------|-------|----------------------------------------------------------------------------------------------------------------------------------------------------------|
| Public sector        | .37   | .48               | 0       | 1       | 2 205 | Do you work for a private company or in the public sector?                                                                                               |
| Age                  | 43.94 | 13.49             | 18      | 83      | 2 164 | In what year were you born?                                                                                                                              |
| Male                 | .52   | .50               | 0       | 1       | 2 200 | Are you a male or a female?                                                                                                                              |
| Children             | .43   | .49               | 0       | 1       | 1 711 | How many people in your household are under 18 years old?                                                                                                |
| Education            | 1.52  | .71               | 1       | 3       | 2 170 | What is the highest level of education you have completed?                                                                                               |
| Extraverted          | 4.25  | 1.5               | 1       | 7       | 2 159 | How well does the words extraverted and enthusiastic describe you?                                                                                       |
| Union                | .28   | .45               | 0       | 1       | 2 178 | Do you belong to a union?                                                                                                                                |
| March                | .22   | .41               | 0       | 1       | 2 135 | In the last 12 months how many times have you taken part in a march, rally, or protest?                                                                  |
| Boycott              | .40   | .49               | 0       | 1       | 2 095 | In the last 12 months how many times have you bought products for political, ethical, or environmental reasons?                                          |
| Social media         | .33   | .47               | 0       | 1       | 2 137 | In the last 12 months how many times have you used social media to discuss political or public issues with people you do know?                           |
| Online with stranger | .26   | .44               | 0       | 1       | 2 136 | In the last 12 months how many times have you participated in online discussion of a local, national, or international issue with people you don't know? |

**Table 2. Logistic regression, offline and online political activities**

| Covariates               | March                       |                              | Boycott                     |                    | Social media       |                             | Online discussion             |                             |
|--------------------------|-----------------------------|------------------------------|-----------------------------|--------------------|--------------------|-----------------------------|-------------------------------|-----------------------------|
|                          | 1.A                         | 1.B                          | 2.A                         | 2.B                | 3.A                | 3.B                         | 4.A                           | 4.B                         |
| Public sector            | .296 <sup>+</sup><br>(.151) | .472**<br>(.178)             | .004<br>(.134)              | .181<br>(.157)     | .200<br>(.142)     | .403*<br>(.165)             | -.008<br>(.147)               | .302 <sup>+</sup><br>(.172) |
| Union                    | .474**<br>(.156)            | .802**<br>(.237)             | .163<br>(.141)              | .519*<br>(.220)    | -.185<br>(.151)    | .239<br>(.232)              | .109<br>(.154)                | .667**<br>(.227)            |
| Public sector<br>* Union |                             | -.554 <sup>+</sup><br>(.309) |                             | -.600*<br>(.285)   |                    | -.711*<br>(.303)            |                               | -.999**<br>(.305)           |
| Children                 | .153<br>(.135)              | .147<br>(.135)               | .120<br>(.118)              | .115<br>(.118)     | .159<br>(.124)     | .153<br>(.124)              | .376**<br>(.129)              | .369**<br>(.130)            |
| Education                | .197*<br>(.086)             | .205*<br>(.086)              | .182*<br>(.077)             | .190*<br>(.077)    | .125<br>(.080)     | .135 <sup>+</sup><br>(.081) | .157 <sup>+</sup><br>(.083)   | .171*<br>(.083)             |
| Male                     | .199<br>(.134)              | .184<br>(.135)               | -.288*<br>(.115)            | -.306**<br>(.116)  | -.107<br>(.122)    | -.128<br>(.123)             | .276*<br>(.128)               | .250 <sup>+</sup><br>(.129) |
| Age                      | -.082**<br>(.029)           | -.081**<br>(.029)            | -.108***<br>(.026)          | -.107***<br>(.025) | -.114***<br>(.027) | -.113***<br>(.027)          | -.097***<br>(.028)            | -.096**<br>(.028)           |
| Age <sup>2</sup>         | .001 <sup>+</sup><br>(.000) | .001 <sup>+</sup><br>(.000)  | .001**<br>(.000)            | .001**<br>(.000)   | .001**<br>(.000)   | .001**<br>(.000)            | .000*<br>(.000)               | .001*<br>(.000)             |
| Extravert                | .159***<br>(.045)           | .154**<br>(.045)             | .067 <sup>+</sup><br>(.038) | .062<br>(.038)     | .006<br>(.040)     | .000<br>(.040)              | .002<br>(.042)                | -.009<br>(.042)             |
| Interest                 | .225***<br>(.032)           | .225***<br>(.032)            | .251***<br>(.027)           | .252***<br>(.023)  | .370***<br>(.031)  | .371***<br>(.031)           | .359***<br>(.033)             | .362***<br>(.033)           |
| N                        | 1 599                       | 1 599                        | 1 571                       | 1 571              | 1 602              | 1 602                       | 1 601                         | 1 601                       |
| Constant                 | -1.769<br>(.649)            | -1.826<br>(.649)             | .258<br>(.572)              | .187<br>(.572)     | .000<br>(.606)     | -.073<br>(.610)             | -1.207 <sup>+</sup><br>(.623) | -1.32*<br>(.624)            |
| Pseudo R <sup>2</sup>    | .10                         | .10                          | .08                         | .08                | .14                | .14                         | .13                           | .13                         |

Note: Logit regression coefficients. Standard error in parenthesis.

<sup>+</sup>  $p < .10$ , \*  $p < .05$ ; \*\*  $p < .01$ ; \*\*\*  $p < .001$ . Two tailed test.

**Table 3. Marginal effect of union vs. non-union membership on probability of political activity by employment sector**

|                   |                | Union vs. non-union | 95% confidence interval |
|-------------------|----------------|---------------------|-------------------------|
| March             | Public Sector  | 4.6<br>(.04)        | -3, 12                  |
|                   | Private Sector | 13.5**<br>(.05)     | 4, 23                   |
| Boycott           | Public Sector  | -2.0<br>(.04)       | -10, 6                  |
|                   | Private Sector | 12.6*<br>(.05)      | 2, 23                   |
| Social media      | Public Sector  | -10.3*<br>(.04)     | -19, -2                 |
|                   | Private Sector | 5.2<br>(.05)        | -5, 15                  |
| Online discussion | Public Sector  | -6.1<br>(.04)       | -14, 1.3                |
|                   | Private Sector | 13.41**<br>(.05)    | 4, 23                   |

<sup>+</sup>  $p < .10$ ; \*  $p < .05$ ; \*\*  $p < .01$ ; \*\*\*  $p < .001$ . Control variables held constant at means.

**Figure 1. Predicted probability of offline and online political activities**

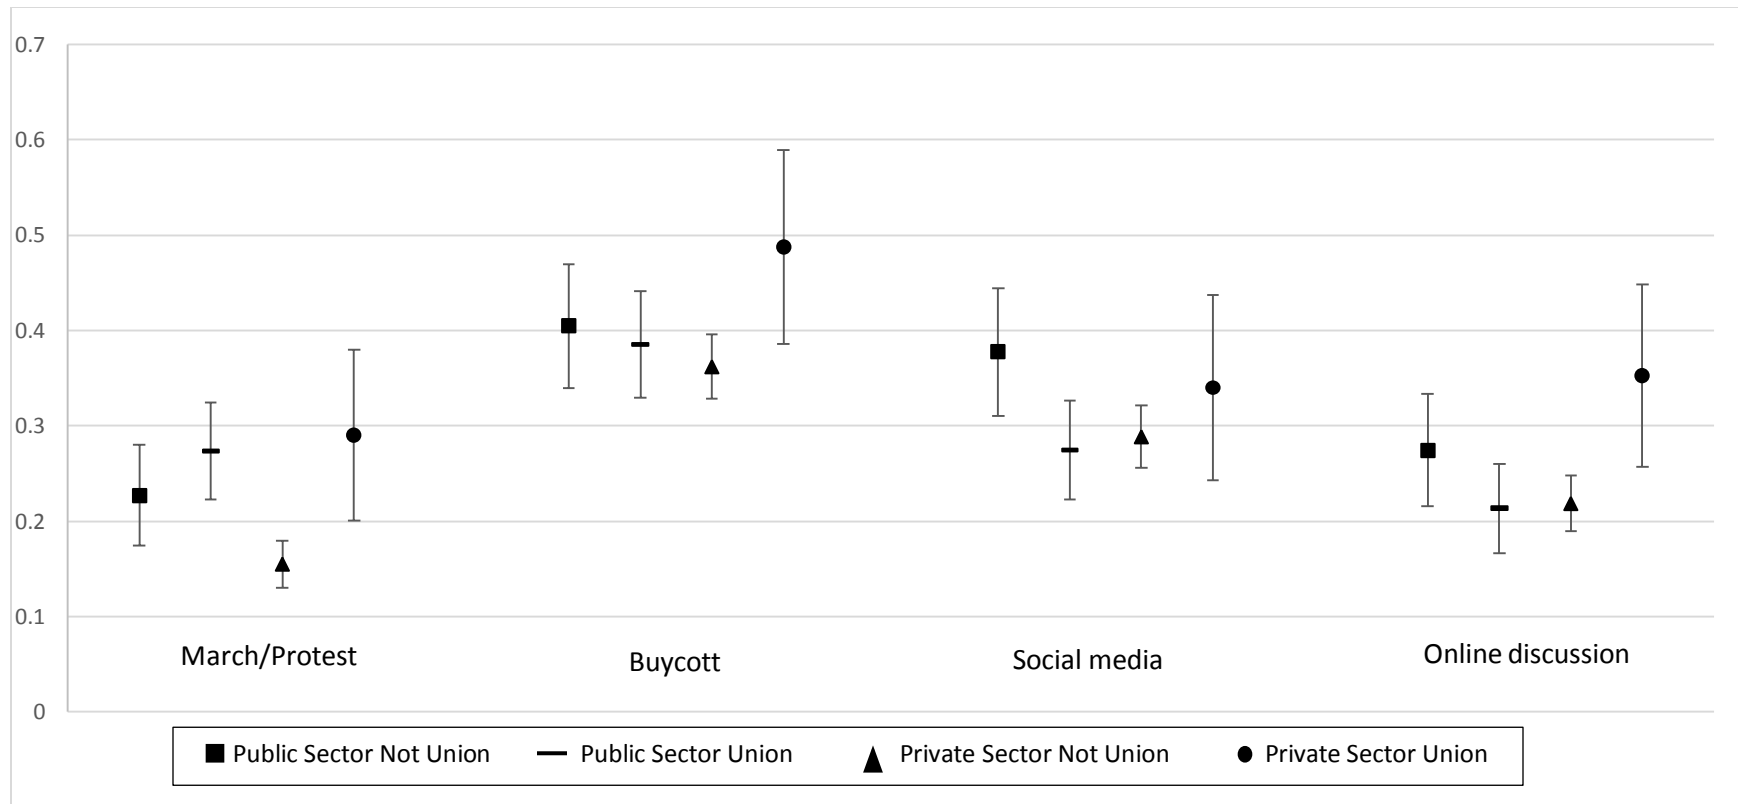

Predicted probability of engaging in activity at least one in the last 12 months. 95% confidence intervals represented by error bars. Control variables held at means.
